# Supplementary material for: Gene-Based Diagnosis of Tuberculosis from Oral Swabs with a New Generation Pathogen Enrichment Technique
Source: PubMed Central journal article supplement (PMC9241603; doi:10.1128/spectrum.00207-22), 2022-05-19
Supplement: spectrum.00207-22-s001.pdf [file spectrum.00207-22-s001.pdf]

1

2

## **Online Supplement**

3

### **Gene-based Diagnosis of TB from Oral Swab with a New Generation Pathogen**

4

#### **Enrichment Technique**

5

Young Ae Kang, Bonhan Koo, Ock-Hwa Kim, Joung Ha Park, Ho Cheol Kim, Hyo Joo Lee,

6

Myoung Gyu Kim, Youngwon Jang, Yong Seo Koo, Na Hyun Kim, Yong Shin, Sei Won Lee

7

and Sung-Han Kim

8

9

#### ***Online Supplementary Materials***

10

Detailed Methods

11

Supplementary Table

12

Supplementary Figure Legend

13

Reference List for Online Supplementary Materials

## 14 **Detailed Methods**

### 15 ***Oral sample analysis***

16 Oral swabs were used for the SLIM assay (SLIM oral swab), and Figure 1 depicts the  
17 overall workflow of the SLIM assay. The principle and the detailed structure of the SLIM  
18 assay have been described previously (1-4). Briefly, the SLIM assay was based on a  
19 combination of a microfluidic platform with low-cost thin film and homobifunctional  
20 imidoesters (HIs) reagents for MTB enrichment and DNA extraction from the oral swab  
21 samples. HIs can be captured from the surface of MTB cells by electrostatic coupling and  
22 they bind with DNA by electrostatic coupling and covalent binding. The oral swab samples (1  
23 mL) were liquefied with liquefaction solution (4% NALC, 1.45% sodium citrate, and 2.67%  
24 NaOH) at a 1:1 ratio as according to the method described by Ganoza et al (5). The liquefied  
25 oral swab samples (2 mL) were mixed with dimethyl pimelimidate (DMP), one of the HIs  
26 (100 mg/mL), and injected into the SLIM platform using a syringe pump after a modification  
27 step with O<sub>2</sub> plasma and 3-aminopropyl diethoxymethylsilane. After incubation at room  
28 temperature, the debris was removed and the cells were lysed by incubation with lysis buffer  
29 with proteinase K and DMP solution at 56 °C. To collect the DNA from the oral swab  
30 samples, 100 µL of elution buffer was injected into the SLIM platform after washing with 1  
31 mL of PBS.

32 For the detection of MTB obtained from the oral samples, we used conventional  
33 *Mycobacterium tuberculosis* PCR to detect the IS6110 transposase and catalase-peroxidase  
34 (*KatG*) gene of TB using the Taq PCR Core Kit (Qiagen, Hilden, Germany). Further PCR-  
35 based confirmation was carried out by the amplification of the 308-bp DNA fragment specific  
36 for the IS6110 gene using IS6110\_F (5'-ACGGTTCAGGGTTAGCCACA-3') and IS6110\_R  
37 (5'-TTAAAGACCGCGTCGGCTTTC-3') primers and the 555-bp DNA fragment specific

38 for *KatG* gene using *KatG\_F* (5'-AACTCGTCGGCCAATTCCTC-3') and *KatG\_R* (5'-  
39 GCAGATGGGGCTGATCTACG-3') primers in all clinical isolates. The PCR process  
40 consisted of an initial denaturation step at 95°C for 15 min; 45 cycles of 95°C for 30 s, 60°C  
41 for 30 s, and 72°C for 30 s; and a final elongation step at 72°C for 10 min. DNA (5 µL) was  
42 amplified in a total volume of 25 µL containing 10× PCR buffer, 2·5 mM MgCl<sub>2</sub>, 0.25 mM  
43 deoxynucleotide triphosphate, 25 pmol of each primer, and 1 unit of Taq DNA polymerase.  
44 Gel electrophoresis was performed to separate the PCR products on a 2% agarose gel  
45 containing LoadingSTAR (A750, Dyne Bio Inc., Seoul, Republic of Korea). The gel was  
46 visualized using the ChemiDoc XRS+ system (Bio-Rad, Marnes-la-Coquette, France). All  
47 results were reported as “positive” or “negative”.

48

**Table S1. Sensitivity and specificity of SLIM oral swab and Xpert relative to each assay and AFB culture**

A. Diagnostic accuracy of SLIM oral swab as the standard reference of Xpert

| Reference standard    | SLIM oral swab |                  |
|-----------------------|----------------|------------------|
|                       | Sensitivity    | Specificity      |
| Xpert                 | 30/54 (55.6%)* | 114/133 (85.7%)* |
| Mycobacterial culture | 61/93 (65.6%)  | 118/138 (85.5%)  |

B. Diagnostic accuracy of Xpert as the standard reference of SLIM oral swab

| Reference standard    | Xpert MTB/RIF              |                             |
|-----------------------|----------------------------|-----------------------------|
|                       | Sensitivity                | Specificity                 |
| SLIM oral swab        | 30/80 (37.5%) <sup>†</sup> | 111/111 (100%) <sup>†</sup> |
| Mycobacterial culture | 50/90 (55.6%)              | 130/130 (100%)              |

The sensitivity of SLIM oral swab relative to Xpert is significantly superior to that of Xpert relative to SLIM oral swab (p=0.039).

**Table S2. The concordance analysis of two assays**

| SLIM<br>oral swab | Xpert<br>MTB/RIF | Confirmed TB   |                | Possible TB | Not TB |
|-------------------|------------------|----------------|----------------|-------------|--------|
|                   |                  | Smear positive | Smear negative |             |        |
| (+)               | (+)              | 18             | 11             | 1           | 0      |
| (+)               | (-)              | 5              | 26             | 18          | 19     |
| (-)               | (+)              | 9              | 13             | 1           | 0      |
| (-)               | (-)              | 2              | 11             | 7           | 111    |
| Total             |                  | 34             | 61             | 27          | 130    |

**Table S3. Characteristics of the patients with a false-positive result in the SLIM oral swab assay**

| No. | Sex | Age | Xpert MTB/RIF | AFB smear | AFB culture              | QFT-plus | Clinical situation                                                                    |
|-----|-----|-----|---------------|-----------|--------------------------|----------|---------------------------------------------------------------------------------------|
| 1   | M   | 36  | Negative      | Negative  | No growth                | Positive | Bilateral centrilobular nodules on CT, improved with antibiotics                      |
| 2   | F   | 69  | Negative      | Negative  | No growth                | Negative | RUL infiltration on regular follow-up                                                 |
| 3   | M   | 58  | Negative      | Negative  | No growth                | Positive | RUL infiltration, anti-TB chemotherapy for 2 months, stopped due to side effects      |
| 4   | M   | 56  | Negative      | Negative  | No growth                | Positive | RUL infiltration on regular follow-up                                                 |
| 5   | F   | 60  | Negative      | Negative  | No growth                | Positive | LUL infiltration, treated as latent TB infection                                      |
| 6   | M   | 59  | Negative      | Negative  | No growth                | Positive | LUL infiltration on regular follow-up, lesion slightly increased                      |
| 7   | F   | 72  |               | Negative  | No growth                | Positive | RUL inflammatory scar on regular follow-up                                            |
| 8   | F   | 65  | Negative      | Positive  | <i>M. avium</i>          | Negative | Treated as NTM pulmonary disease                                                      |
| 9   | M   | 60  | Negative      | Negative  | No growth                |          | RUL inflammatory scar on regular follow-up                                            |
| 10  | M   | 66  | Negative      | Negative  | <i>M. intracellulare</i> |          | Followed up as NTM pulmonary disease without treatment                                |
| 11  | F   | 54  | Negative      | Negative  | No growth                |          | RUL inflammatory scar on regular follow-up                                            |
| 12  | M   | 76  | Negative      | Negative  | No growth                |          | RUL infiltration on regular follow-up                                                 |
| 13  | M   | 57  | Negative      | Negative  | No growth                |          | BUL inflammatory scar on regular follow-up                                            |
| 14  | F   | 68  | Negative      | Negative  | No growth                | Positive | RUL infiltration on regular follow-up                                                 |
| 15  | M   | 41  | Negative      | Negative  | No growth                | Positive | LUL inflammatory scar on regular follow-up                                            |
| 16  | M   | 76  | Negative      | Negative  | No growth                |          | RUL inflammatory scar on regular follow-up                                            |
| 17  | F   | 45  | Negative      | Positive  | <i>M. intracellulare</i> | Negative | Treated as NTM pulmonary disease                                                      |
| 18  | F   | 64  | Negative      | Negative  | <i>M. intracellulare</i> |          | Followed up as NTM pulmonary disease without treatment                                |
| 19  | M   | 77  | Negative      | Negative  | No growth                |          | LUL infiltration, TB relapse suspected but lesion slightly improved without treatment |
| 20  | F   | 56  | Negative      | Negative  | No growth                |          | Bilateral centrilobular nodules on CT, improved with antibiotics                      |

QFT-plus, QuantiFERON-TB Gold Plus; RUL, right upper lobe; LUL, left upper lobe; TB, tuberculosis; NTM, non-tuberculous mycobacterium; BUL, both upper lobe.

Blank cells indicate that the test was not performed.

## Figure legends

### Figure S1. Schematic representation of the workflow of the SLIM assay for the tuberculosis diagnosis.

A mixture of oral swab sample and liquefaction solution with HI reagent is added to the SLIM system to enrich the *Mycobacterium tuberculosis* (MTB) and extract the DNA without the need for detergents or bulky instruments. (1) After injecting 2 ml of liquefied oral swab samples into the SLIM system, the negative charged MTB binds to the positively charged HI for enrichment. (2) Then, DNA from the enriched MTB is isolated by the covalent bonding with HI. (3) After washing with PBS, the DNA is eluted for MTB detection with either PCR or real-time PCR.

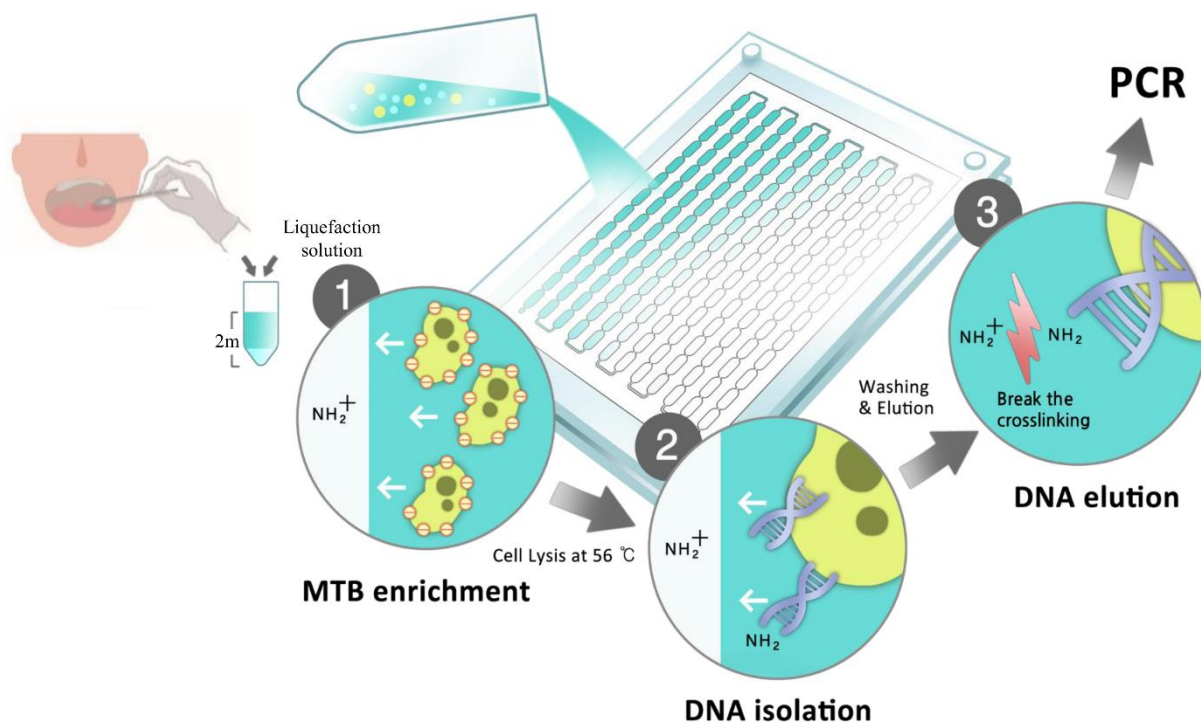

**Figure S2. Representative chest images of a patient with a false-positive result on the SLIM oral swab assay.**

(A) A 69-year-old woman (patient #2 in Table S1) visited our clinic for an incidentally found right upper lobe infiltration on a routine exam without respiratory symptoms. Pulmonary TB was strongly suspected due to the slowly progressing inflammatory lesion in the upper lobe, but her sputum exam did not show any causative organism and she was reluctant to take anti-TB chemotherapy without definite evidence. (B) After one year, her lesion was slightly improved without treatment.

(C) A 58-year-old man (patient #3 in Table S1) was referred for an incidentally found infiltration in the right upper lobe during work-up for hepatocellular carcinoma and liver transplantation. Based on the positive result in the interferon-gamma releasing assay (QuantiFERON-TB Gold Plus [QFT-Plus]), a treatment for active TB or latent TB infection was necessary before transplantation. The treatment for active TB was initiated and the patient initially showed responses to the treatment; however, the treatment was stopped after 3 months due to side effects and a negative result in AFB culture.



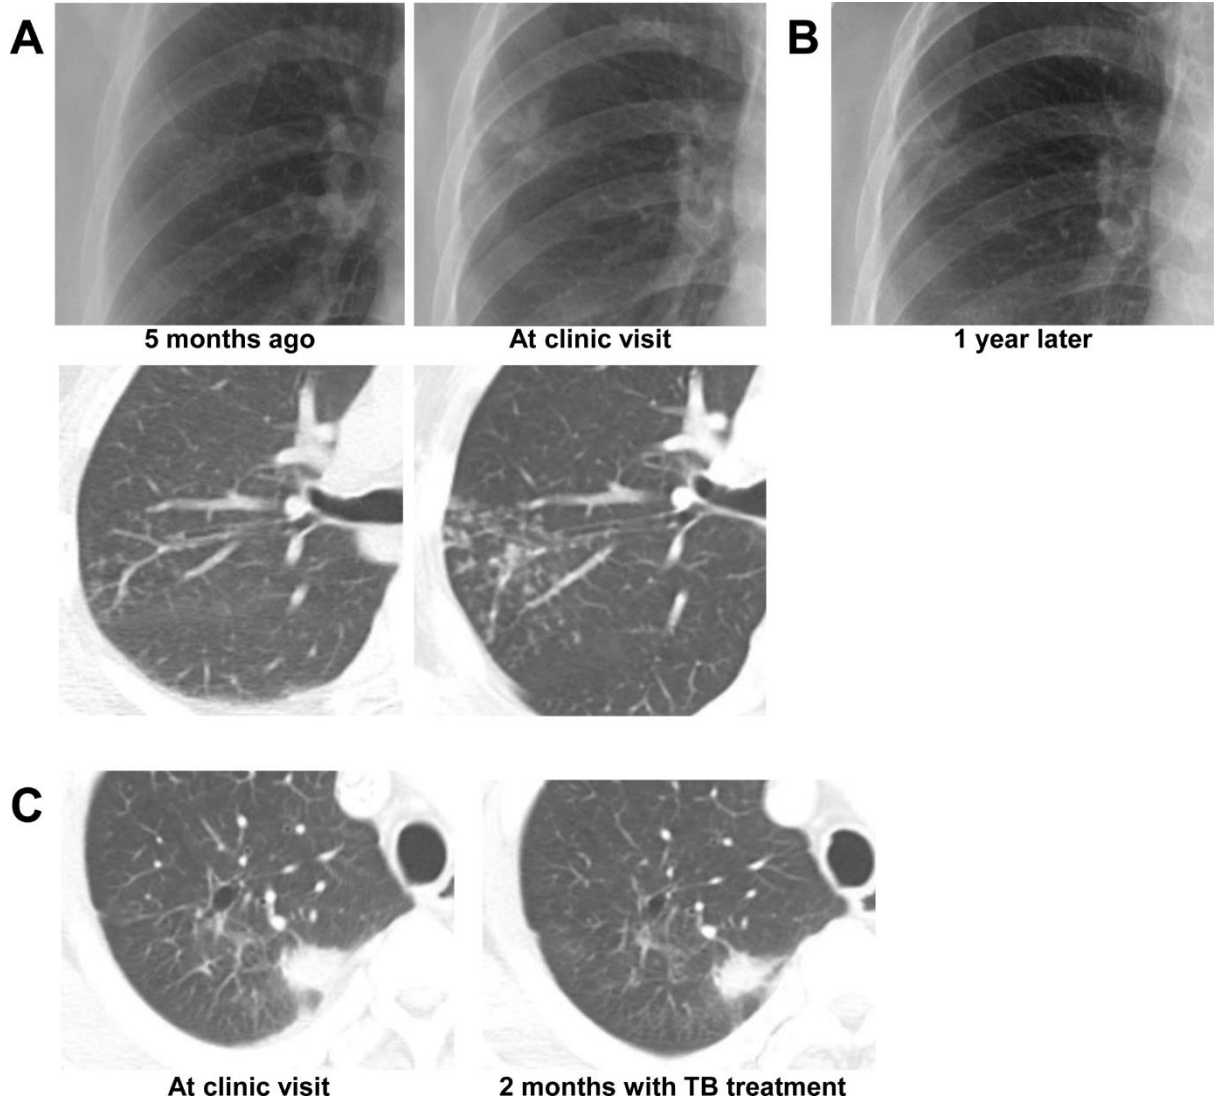

**Figure S3. Schematic work-flow of *Mycobacterium tuberculosis* PCR in SLIM assay.**

Diagnosis of TB was carried out according to the schematic work-flow. DNAs were extracted from 272 oral swab samples, including confirmed TB, possible TB, and not TB, using SLIM assay. The amplified DNAs with the specific primers of the *IS6110* transposase and *catalase-peroxidase (KatG)* genes were analyzed by using agarose gel and Sanger sequencing methods. In the 1st PCR, 272 oral swab samples were classified as Positive (two gene positives), Negative (two gene negatives), and Undecided (one gene positive and one gene negative). Except for 261 confirmed results, 2nd PCR was performed with 11 undecided samples from the 1st PCR. Then, 3rd PCR was performed with one undecided sample from the 2nd PCR. As a result, 272 samples were classified as 104 positives and 144 negatives.

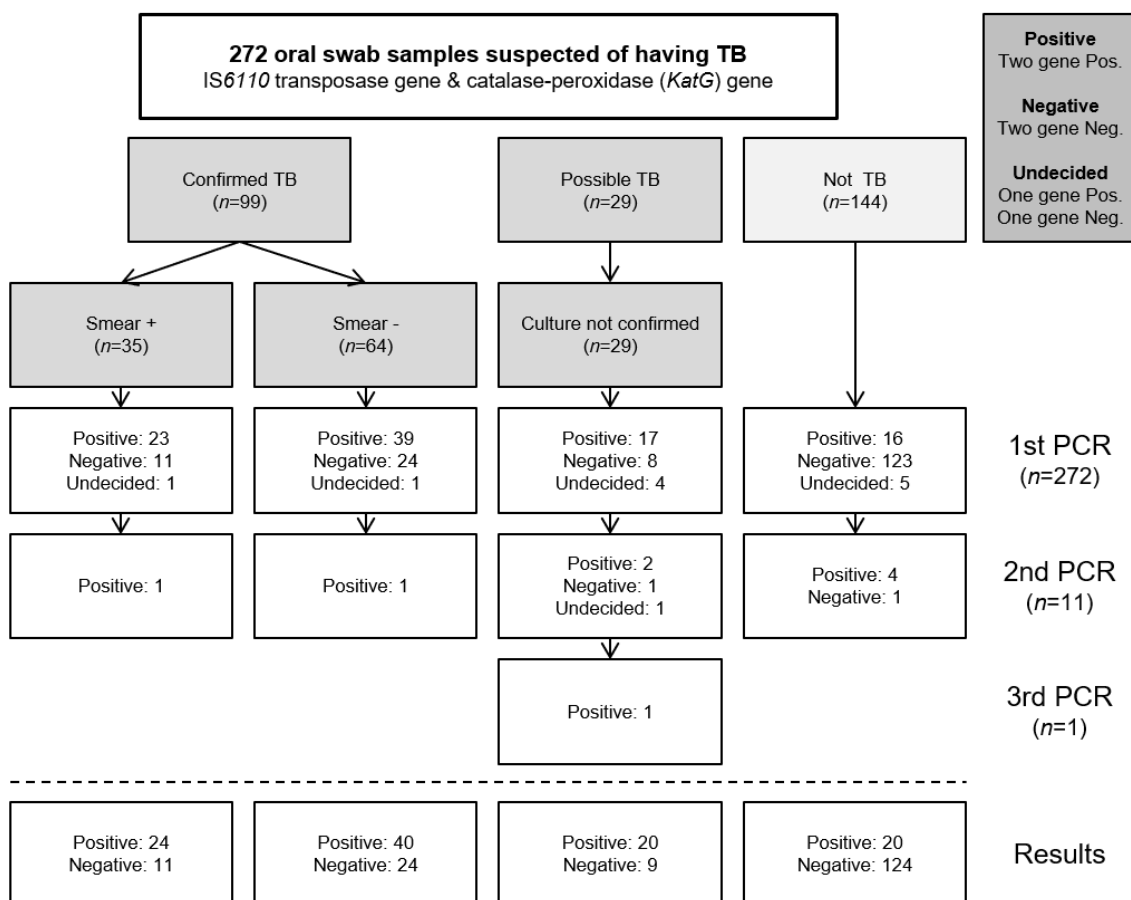

**Figure S4. Confirmation of positive results for TB detection in the SLIM assay.**

The extracted DNA was used to detect the *IS6110* transposase and *catalase-peroxidase (KatG)* gene by end-point PCR assay. Then, the amplified DNA product was purified and TB was confirmed using Sanger sequencing and Basic Local Alignment Search Tool (BLAST) system from National Center for Biotechnology Information (NCBI).

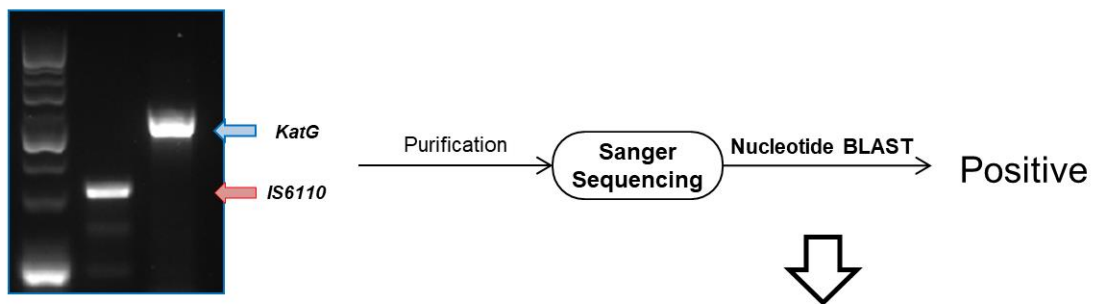

Sequencing using *IS6110* primer

100 sequences selected

| Organism                                                       | Blast Name                    | Score | Number of Hits      | Description                                                       |
|----------------------------------------------------------------|-------------------------------|-------|---------------------|-------------------------------------------------------------------|
| <a href="#">Mycobacterium tuberculosis complex</a>             | <a href="#">high GC Gram+</a> |       | <a href="#">100</a> |                                                                   |
| · <a href="#">Mycobacterium tuberculosis</a>                   | <a href="#">high GC Gram+</a> | 364   | <a href="#">98</a>  | <a href="#">Mycobacterium tuberculosis hits</a>                   |
| · <a href="#">Mycobacterium tuberculosis variant bovis BCG</a> | <a href="#">high GC Gram+</a> | 364   | <a href="#">1</a>   | <a href="#">Mycobacterium tuberculosis variant bovis BCG hits</a> |
| · <a href="#">Mycobacterium orygis</a>                         | <a href="#">high GC Gram+</a> | 364   | <a href="#">1</a>   | <a href="#">Mycobacterium orygis hits</a>                         |

Sequencing using *KatG* primer

100 sequences selected

| Organism                                                       | Blast Name                    | Score | Number of Hits      | Description                                                       |
|----------------------------------------------------------------|-------------------------------|-------|---------------------|-------------------------------------------------------------------|
| <a href="#">Mycobacterium tuberculosis complex</a>             | <a href="#">high GC Gram+</a> |       | <a href="#">152</a> |                                                                   |
| · <a href="#">Mycobacterium tuberculosis</a>                   | <a href="#">high GC Gram+</a> | 462   | <a href="#">140</a> | <a href="#">Mycobacterium tuberculosis hits</a>                   |
| · <a href="#">Mycobacterium tuberculosis variant bovis</a>     | <a href="#">high GC Gram+</a> | 462   | <a href="#">7</a>   | <a href="#">Mycobacterium tuberculosis variant bovis hits</a>     |
| · <a href="#">Mycobacterium tuberculosis variant bovis BCG</a> | <a href="#">high GC Gram+</a> | 462   | <a href="#">3</a>   | <a href="#">Mycobacterium tuberculosis variant bovis BCG hits</a> |
| · <a href="#">Mycobacterium tuberculosis H37Rv</a>             | <a href="#">high GC Gram+</a> | 462   | <a href="#">1</a>   | <a href="#">Mycobacterium tuberculosis H37Rv hits</a>             |
| · <a href="#">Mycobacterium orygis</a>                         | <a href="#">high GC Gram+</a> | 462   | <a href="#">1</a>   | <a href="#">Mycobacterium orygis hits</a>                         |

## References

1. Lee SW, Kang YA, Jin CE, Kim HC, Noh GS, Lee HJ, Park JH, Koo YS, Shin Y, Kim SH. 2020. Gene-based diagnosis of tuberculosis with a new-generation pathogen enrichment technique. *Eur Respir J* 55:1901885.  
<https://doi.org/10.1183/13993003.01885-2019>.
2. Jin CE, Koo B, Lee EY, Kim JY, Kim SH, Shin Y. 2018. Simple and label-free pathogen enrichment via homobifunctional imidoesters using a microfluidic (SLIM) system for ultrasensitive pathogen detection in various clinical specimens. *Biosens Bioelectron* 111:66-73. <https://doi.org/10.1016/j.bios.2018.04.001>.
3. Park JH, Jin CE, Koo B, Kwon JS, Cha HH, Kim JY, Noh GS, Koo YS, Jeon SB, Lee SA, Shin Y, Kim SH. 2019. A simple microfluidic assay for diagnosing tuberculous meningitis in HIV-uninfected patients. *J Clin Microbiol* 57:e01975-01918.  
<https://doi.org/10.1128/JCM.01975-18>.
4. Jin CE, Koo B, Lee HJ, Park IJ, Kim SH, Shin Y. 2020. Bis(sulfosuccinimidyl)suberate-based helix-shaped microchannels as enhancers of biomolecule isolation from liquid biopsies. *Anal Chem* 92:11994-12001.  
<https://doi.org/10.1021/acs.analchem.0c02503>.
5. Ganoza CA, Ricaldi JN, Chauca J, Rojas G, Munayco C, Agapito J, Palomino JC, Guerra H. 2008. Novel hypertonic saline-sodium hydroxide (HS-SH) method for decontamination and concentration of sputum samples for *Mycobacterium tuberculosis* microscopy and culture. *J Med Microbiol* 57:1094-1098.  
<https://doi.org/10.1099/jmm.0.2008/001339-0>.
